# Supplementary material for: Investigating the Role of Free-Ranging Wild Boar (Sus scrofa) in the Re-Emergence of Enzootic Pneumonia in Domestic Pig Herds: A Pathological, Prevalence and Risk-Factor Study
Source: PubMed Central journal article supplement (PMC4352045; doi:10.1371/journal.pone.0119060), 2015-03-06
Supplement: pone.0119060.s001.pdf [file pone.0119060.s001.pdf]

**Table S1. Prevalence of infection per sampling unit and hunting season.**

| <b>Study unit</b> | <b>Hunting season 1</b> | <b>Hunting season 2</b> | <b>p-value</b> |
|-------------------|-------------------------|-------------------------|----------------|
| <b>A</b>          | 60.4 (45.2-74.2)        | 51.6 (40.9-62.2)        | 0.3724         |
| <b>B</b>          | 43.5 (30.9-56.7)        | 47.6 (37.9-57.5)        | 0.1207         |
| <b>C</b>          | 20.0 (6.8-40.7)         | 20.5 (9.2-36.4)         | 1.000          |
| <b>D</b>          | 42.1 (20.2-66.5)        | 33.3 (21.0-47.4)        | 0.5806         |
| <b>E</b>          | 14.1 (7.9-22.5)         | 6.2 (3.6-10.0)          | 0.0313         |

Estimated prevalence of infection with *Mycoplasma hyopneumoniae* in wild boar is indicated for the five units A-E and for two consecutive hunting seasons. Prevalences are given in percent and followed by 95% confidence intervals in parentheses. P-values indicate the level of significance of the prevalence difference between the two hunting seasons.
